# The American Journal of Psychiatry

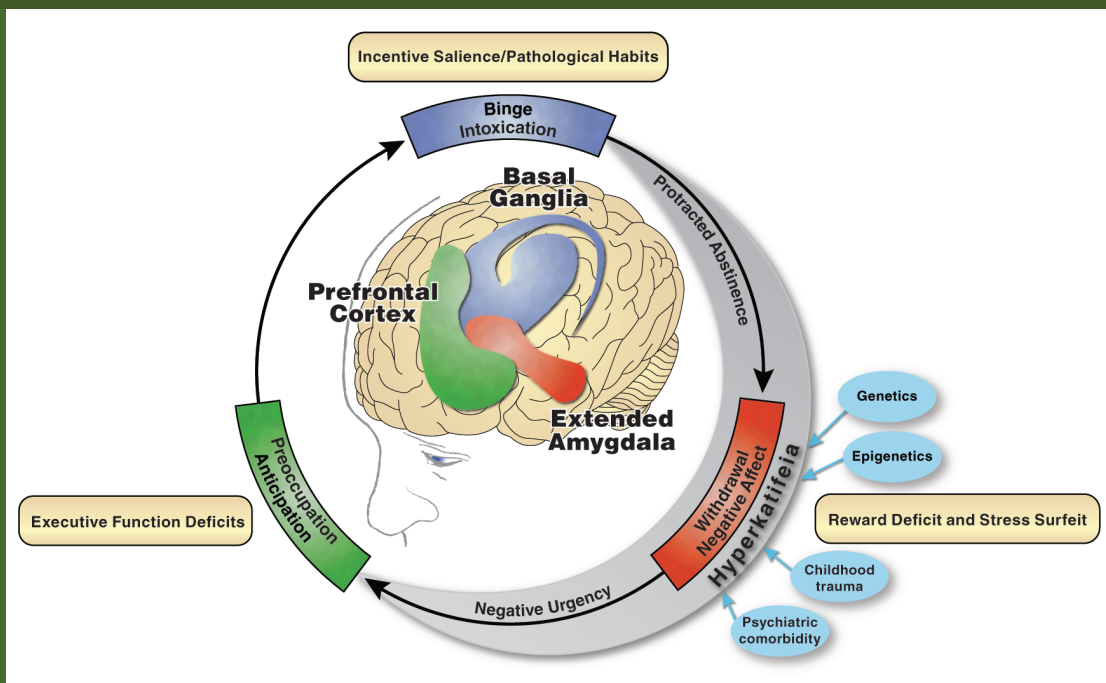

Addiction as a Coping Response: Hyperkatifeia,  
Deaths of Despair, and COVID-19

Association of Prefrontal-Striatal Functional Pathology With Alcohol  
Abstinence Days at Treatment Initiation and Heavy Drinking  
After Treatment Initiation

Association of Prenatal Alcohol Exposure With Psychological,  
Behavioral, and Neurodevelopmental Outcomes in Children  
From the ABCD Study

Alcohol, Tobacco, and Comorbid Psychiatric Disorders and  
Associations With Sexual Identity and Stress-Related Correlates
